# Supplementary material for: Enhanced photocatalytic degradation of tetracycline hydrochloride by hollow nanofiber Ag@ZnGa2O4/ZnO with synergistic effects of LSPR and S-scheme interface engineering
Source: Royal Society of Chemistry journal article supplement (doi:10.1039/d4tc02853h), 2024-01-01
Supplement: d4tc02853h1.pdf [file d4tc02853h1.pdf]

## Enhanced photocatalytic degradation of tetracycline hydrochloride by hollow nanofiber Ag @ ZnGa<sub>2</sub>O<sub>4</sub>/ ZnO with synergistic effects of LSPR and S-scheme interface engineering

Zhiyuan Chen, Wenhui Chen, Peipei Han, Jizhou Yang, Zhi Wan, Peng Hu,  
Feng Teng and Haibo Fan\*

School of Physics, Northwest University, Xi'an 710127, China

\* Corresponding author: hbfan@nwu.edu.cn (H. B. Fan)

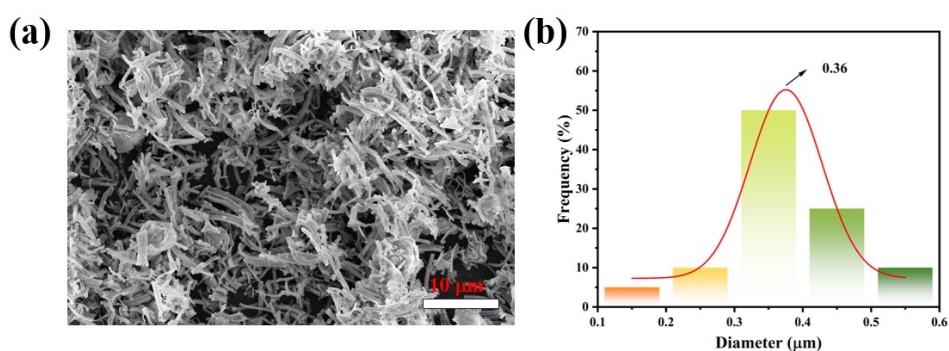

Figure.S1 (a) lower magnification SEM characterization, (b) particle size frequency distribution histogram

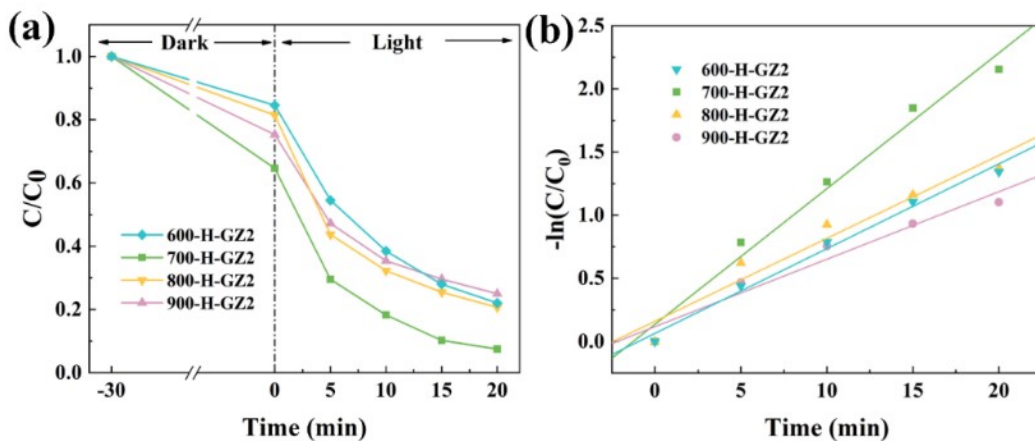

Figure.S2 Photocatalytic degradation diagrams of all samples at different annealing temperatures (a) and photocatalytic rate fitting diagram (b)

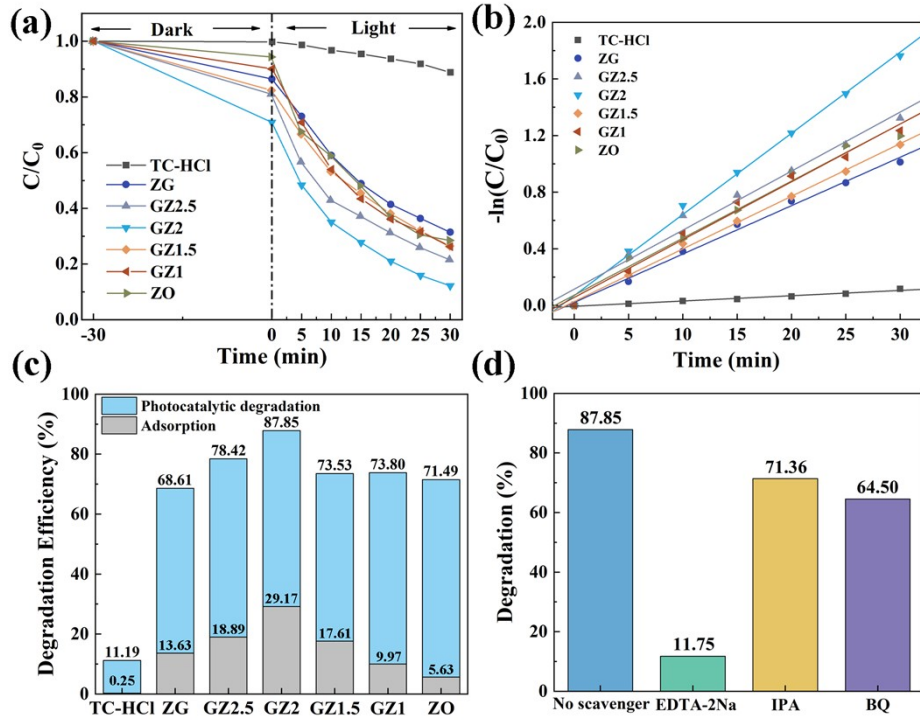

**Figure.S3** Photocatalytic degradation diagram of  $ZnGa_2O_4$  and  $ZnO$  with different proportions (a), photocatalytic rate fitting diagram (b), Histogram of degradation efficiency of TC-HCl of all samples (c), Capture experiment diagram of active species during degradation process (d)

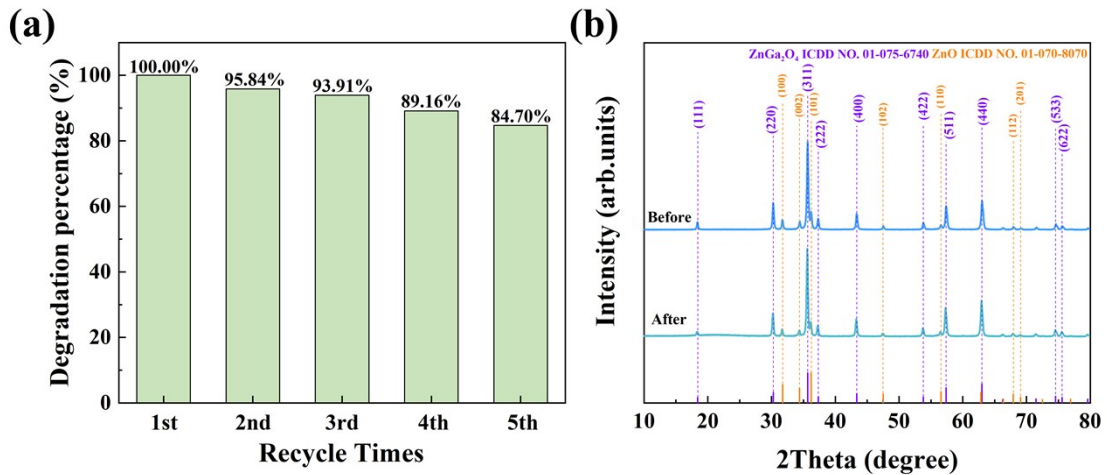

**Figure.S4** Cyclic test of GZ2 under xenon lamp irradiation (a) and XRD pattern of GZ2 before and after cyclic test (b)

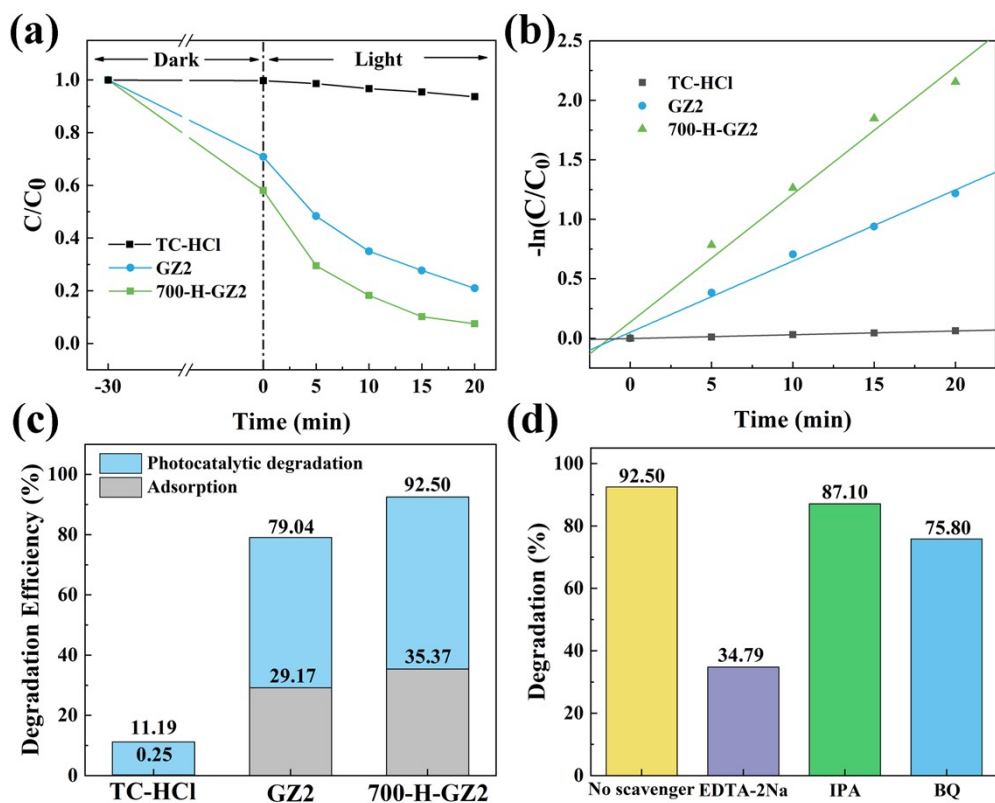

**Figure.S5** Photocatalytic degradation diagram of different samples (a), photocatalytic rate fitting diagram (b), degradation efficiency diagram of TC-HCl degradation diagram of different samples (c) and Capture experiment diagram of degradation process of 700-H-GZ2 (d)

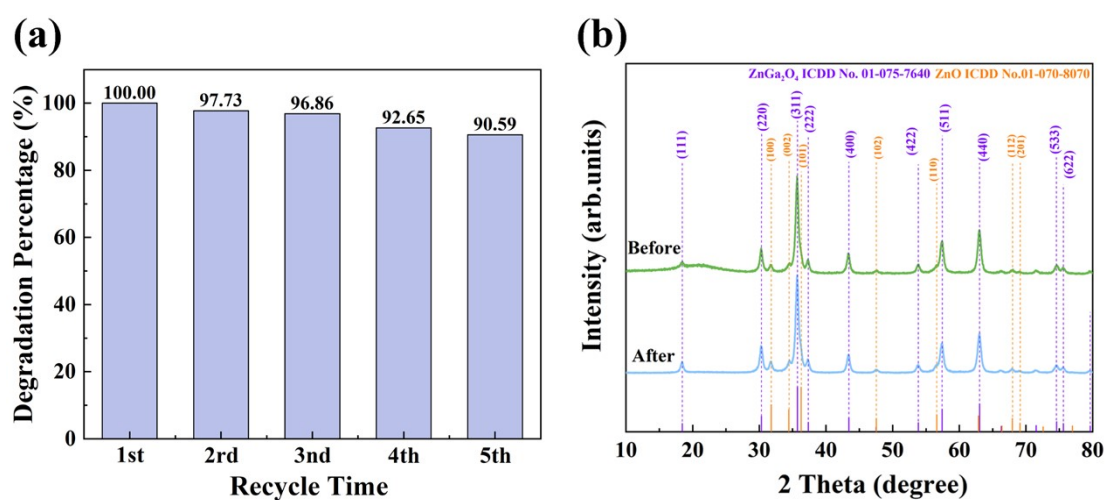

**Figure.S6** Photocatalytic cycle of 700-H-GZ2 (a) and XRD pattern (b)
